# Supplementary material for: Facile synthesis of MnOx nanoparticles sandwiched between nitrogen-doped carbon plates for lithium ion batteries with stable capacity and high-rate capability
Source: Royal Society of Chemistry journal article supplement (doi:10.1039/c5ra26411a), 2016-01-01
Supplement: c5ra26411a1.pdf [file c5ra26411a1.pdf]

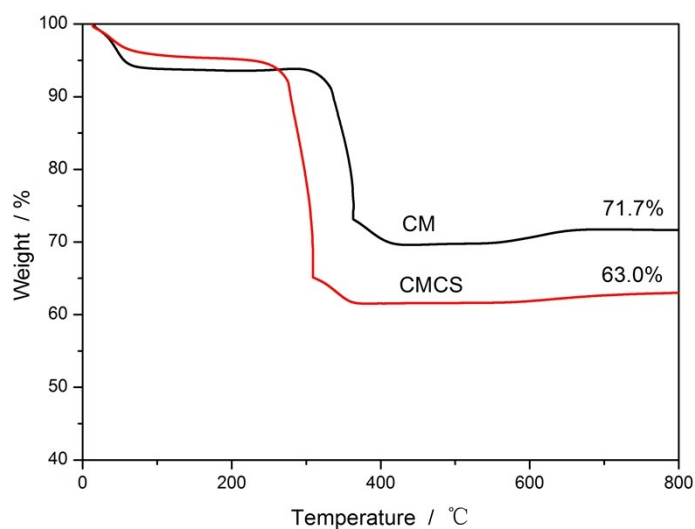

Fig. S1. TGA curves of CM and CMCS (10 °C/min heating in air).

Table S1. Elemental contents in CM

| Element | O    | C     | N    | Mn   |
|---------|------|-------|------|------|
| wt%     | 16.7 | 30.39 | 3.21 | 49.7 |

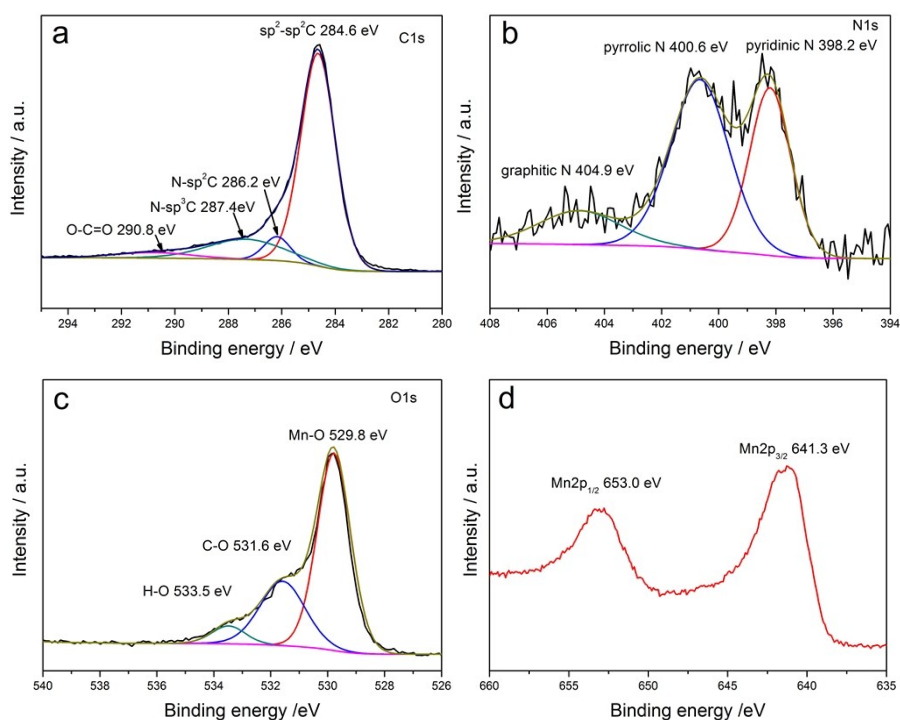

Fig. S2. XPS spectra of CM: (a) high-resolution of C1s, (b) high-resolution of N1s, (c) high-resolution of O1s, (d) high-resolution of Mn2p.

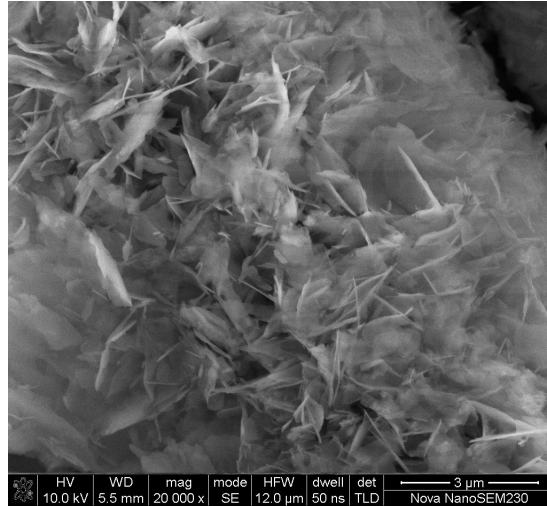

Fig. S3. SEM images of basic magnesium carbonate

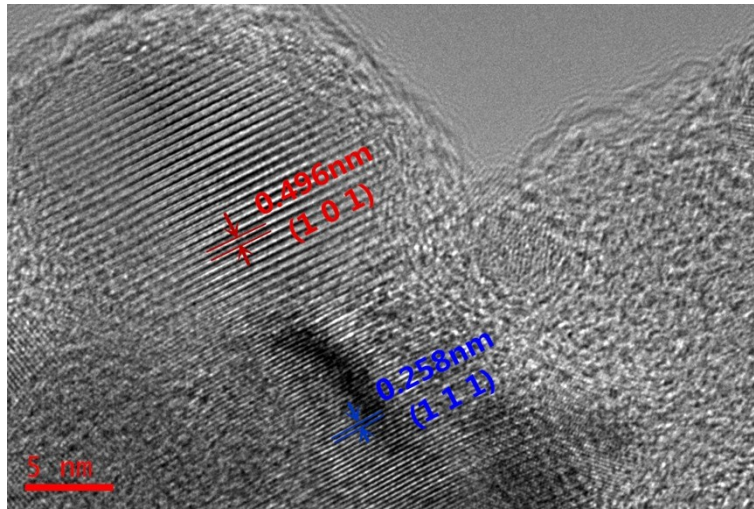

Fig. S4. HRTEM image of CMCS.

Table S2 Electrochemical performances of the reported manganese oxide anode materials

| Sample                                              | Current (A/g) | Cycle number | Capacity (mAh/g) | Ref.     |
|-----------------------------------------------------|---------------|--------------|------------------|----------|
| Mn <sub>3</sub> O <sub>4</sub> nano-octahedra       | 0.05          | 50           | ~ 500            | 36       |
| Mn <sub>3</sub> O <sub>4</sub> /graphene composites | 0.06          | 40           | 500              | 9        |
| MnO/nitrogen-doped carbon composites                | 0.1           | 50           | 473              | 33       |
| MnO nanoparticles coated with nitrogen-doped carbon | 0.1           | 100          | 634              | 29       |
| N-doped MnO/graphene nanosheets                     | 0.1           | 90           | 772              | 27       |
| MnO/rGO composite                                   | 0.2           | 100          | 750              | 26       |
| MnO/MWNTs                                           | 0.216         | 200          | 480.6            | 18       |
| Mesoporous Mn <sub>3</sub> O <sub>4</sub> nanotubes | 0.5           | 100          | 641              | 14       |
| MnO/rGO nanocomposite                               | 0.5           | 150          | 775.8            | 31       |
| MnO/C nanostructured spheres                        | 0.5           | 300          | 501              | 6        |
| Nitrogen-doped C/MnO <sub>x</sub> /C composite      | 0.2           | 100          | 770.9            | Our work |

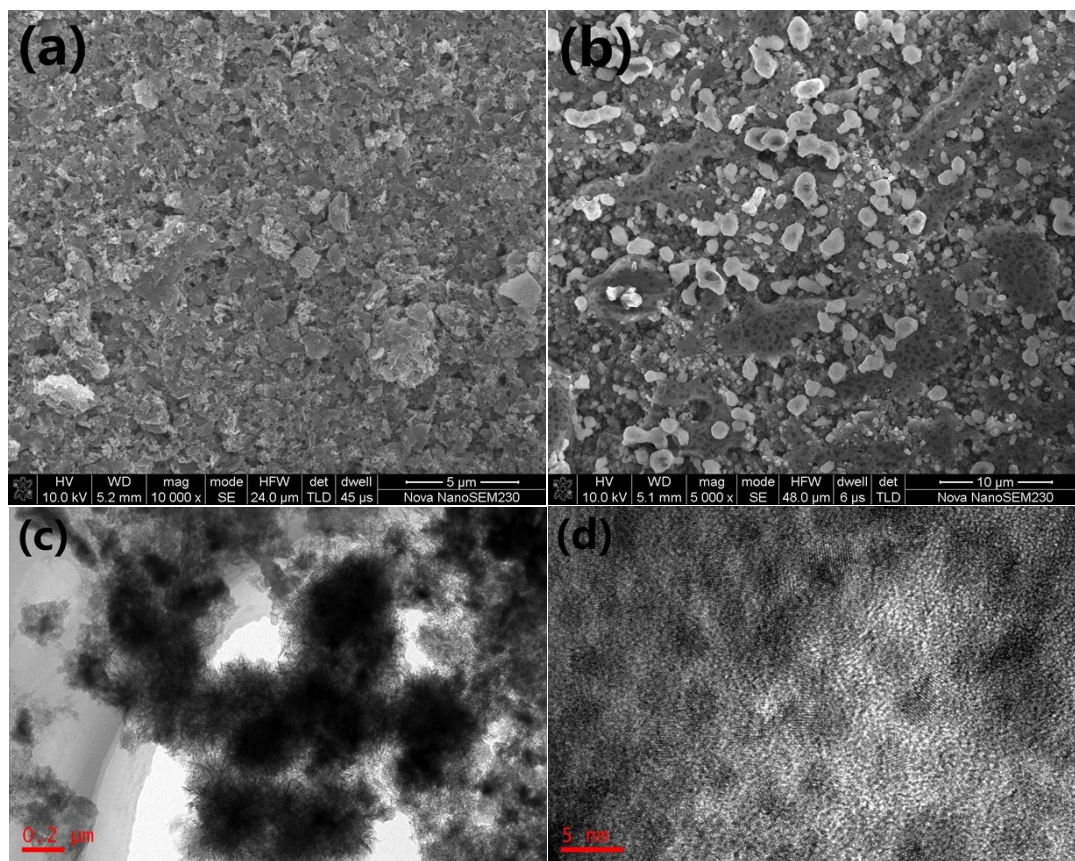

Fig. S5. SEM images of CM electrode (a) before discharge/charge, (b) after discharge/charge. (c) TEM image of CM after discharge/charge. (d) HRTEM image of CM after discharge/charge.

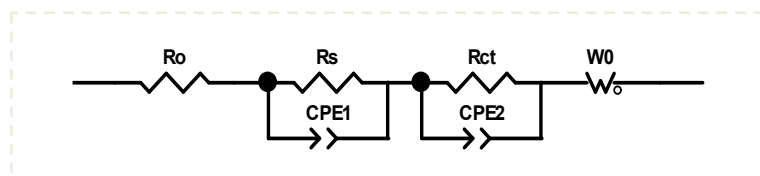

Fig. S6 The relevant equivalent circuit model.
